# Supplementary material for: Aqueous dispersions of layered double hydroxide/polyacrylamide nanocomposites: preparation and rheology
Source: Royal Society of Chemistry journal article supplement (doi:10.1039/c4ta01590h), 2014-06-16
Supplement: c4ta01590h1.pdf [file c4ta01590h1.pdf]

## Electronic Supporting Information

### Aqueous dispersions of layered double hydroxide/polyacrylamide nanocomposites: preparation and rheology

Ziqiao Hu and Guangming Chen\*

*Beijing National Laboratory for Molecular Sciences (BNLMS), Institute of Chemistry, Chinese Academy of Sciences,*

*Beijing 100190, P. R. China.*

*E-mail: chengm@iccas.ac.cn (G. Chen)*

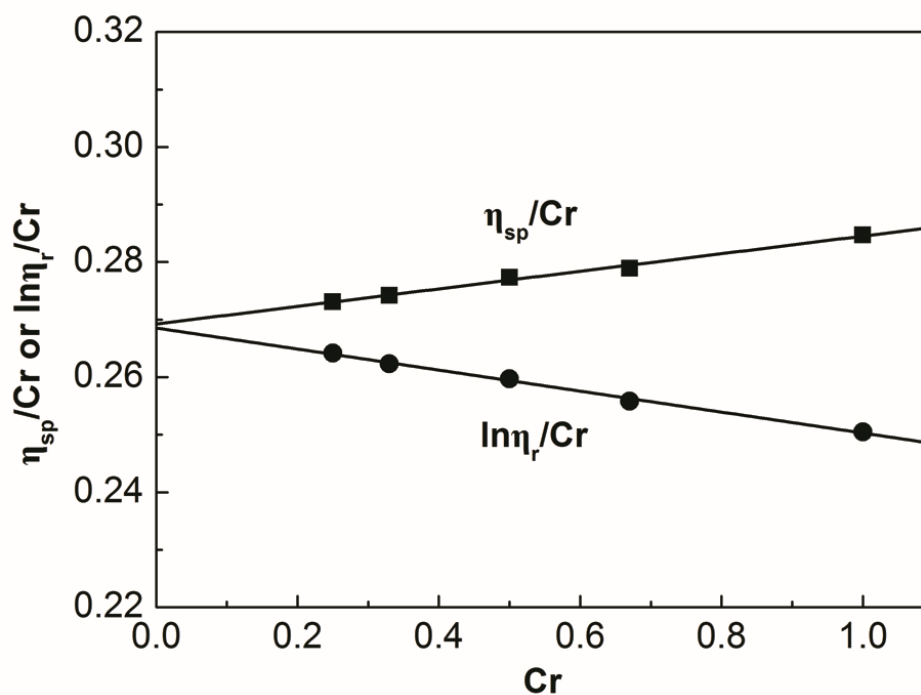

**Fig. S1** Dependence of  $\eta_{sp}/Cr$  or  $\ln\eta_r/Cr$  on  $Cr$  for calculation of  $[\eta]$ , wherein  $\eta_{sp} = \eta_r - 1$ , and  $Cr = C / C_0$ .

Fig. S1 shows the dependence of specific viscosity ( $\eta_{sp}$ ) or  $\ln\eta_r$  on the ratio (Cr) of the diluted concentration to the initial PAM solution concentration ( $C_0$ ), where  $\eta_{sp} = \eta_r - 1$ . According to the two intercepts of the fitting lines, the average value (H) was obtained. Then,  $[\eta]$  was measured to be  $[\eta] = H/C_0 = 451.2 \text{ mL g}^{-1}$ . The corresponding average molecular weight was calculated to be  $1.67 \times 10^6$ , according to the equation of  $M = 802 \times [\eta]^{1.25}$ .

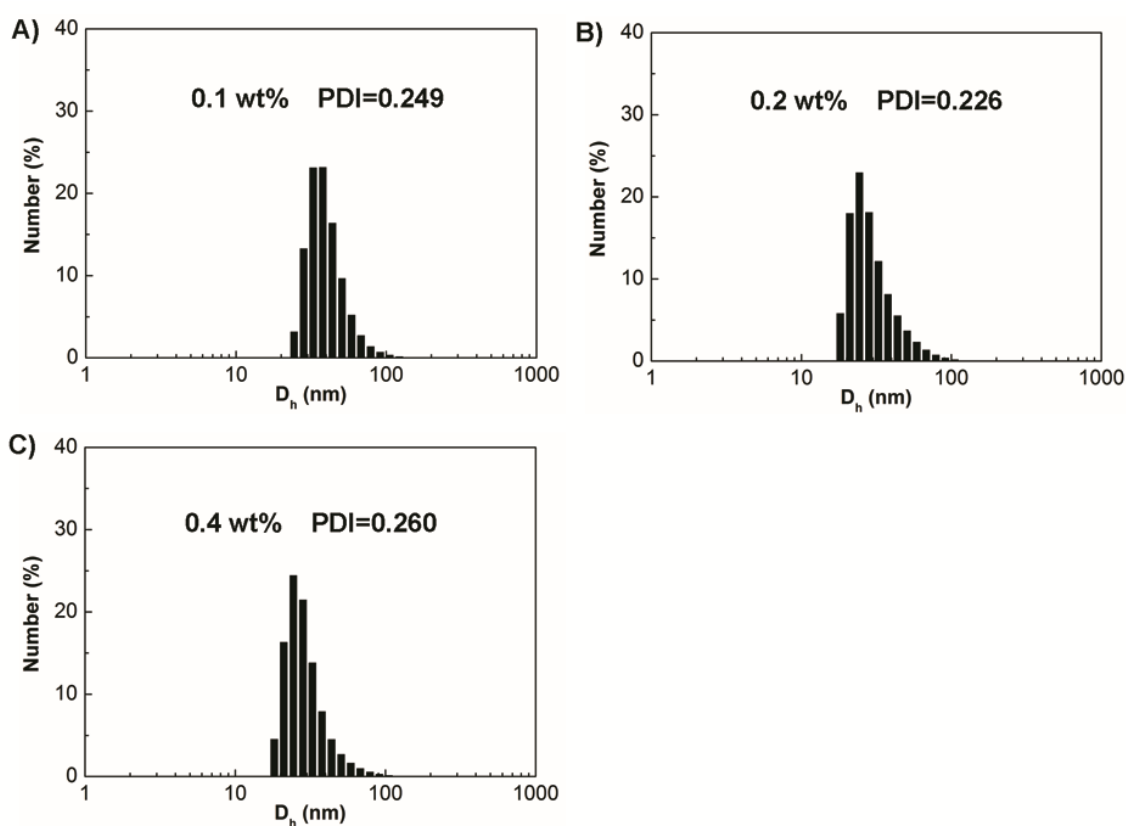

**Fig. S2** Particle size distributions measured by DLS for the aqueous dispersions of the LDH-Ise at different concentrations.

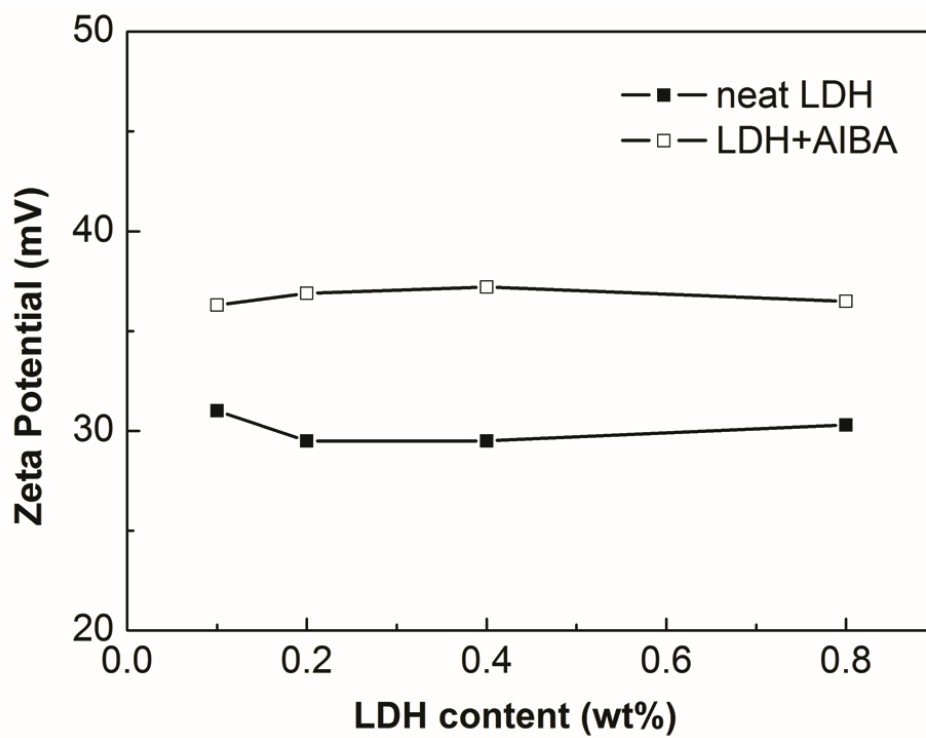

**Fig. S3** Comparison of the  $\xi$  potentials between the neat LDH and the mixture of LDH+AIBA (AIBA content: 0.1 wt%).
